# Supplementary material
Source: bioRxiv or medRxiv preprint supplement (https://www.biorxiv.org/highwire/filestream/6591/field_highwire_adjunct_files/16/024869-7.pdf)

### A. Females

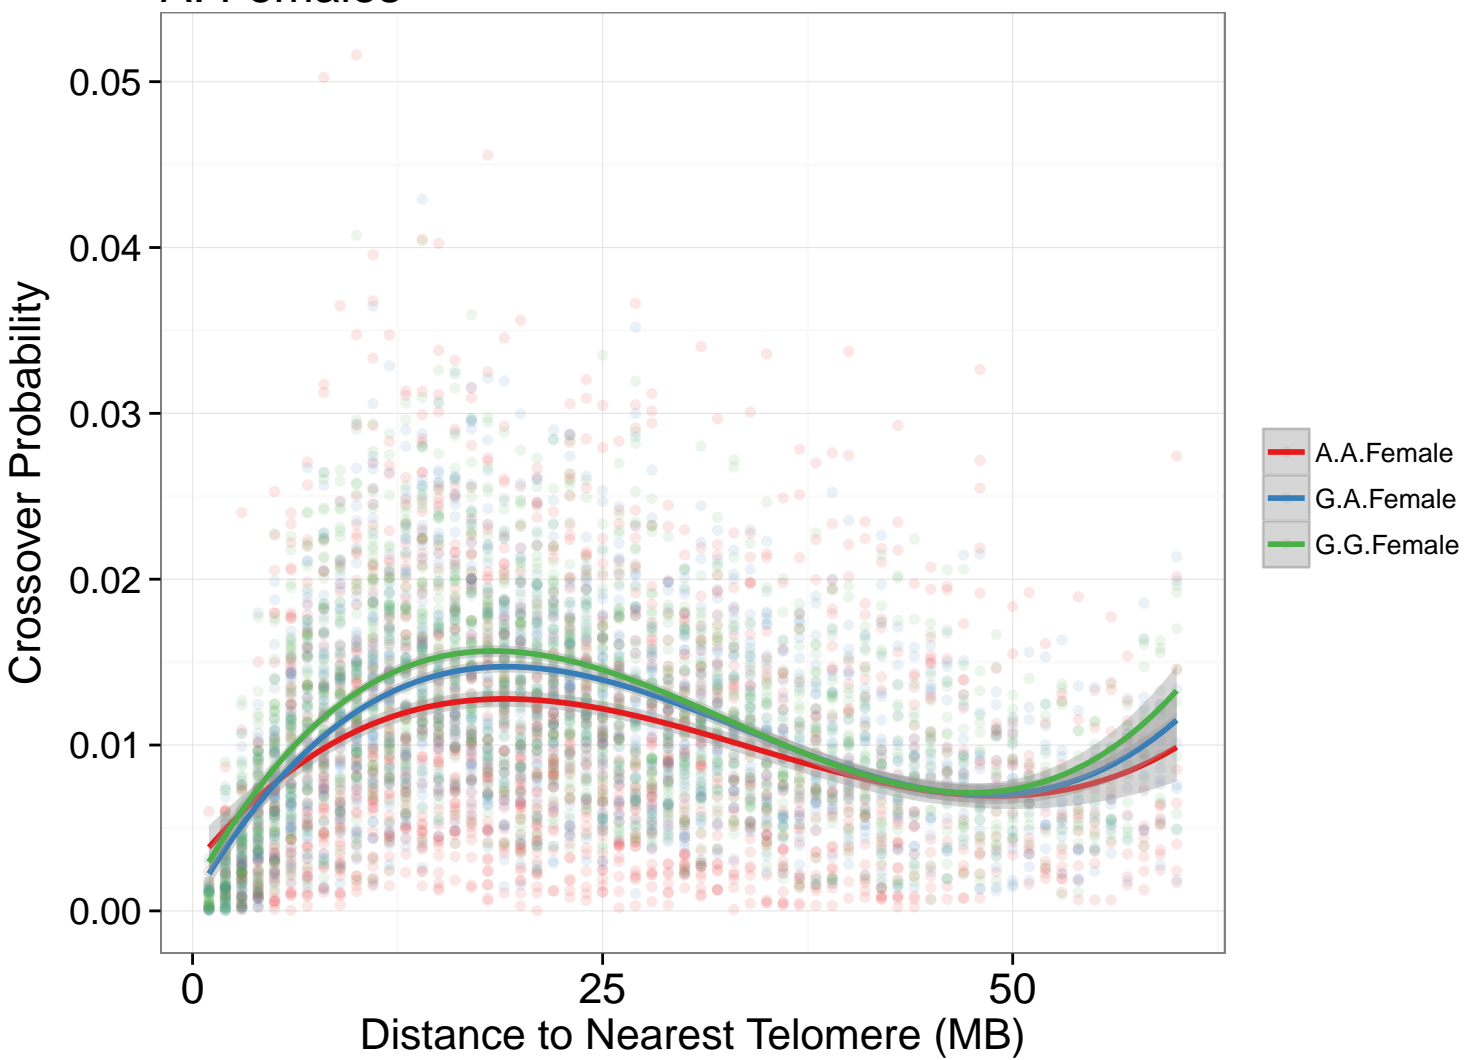

### B. Males

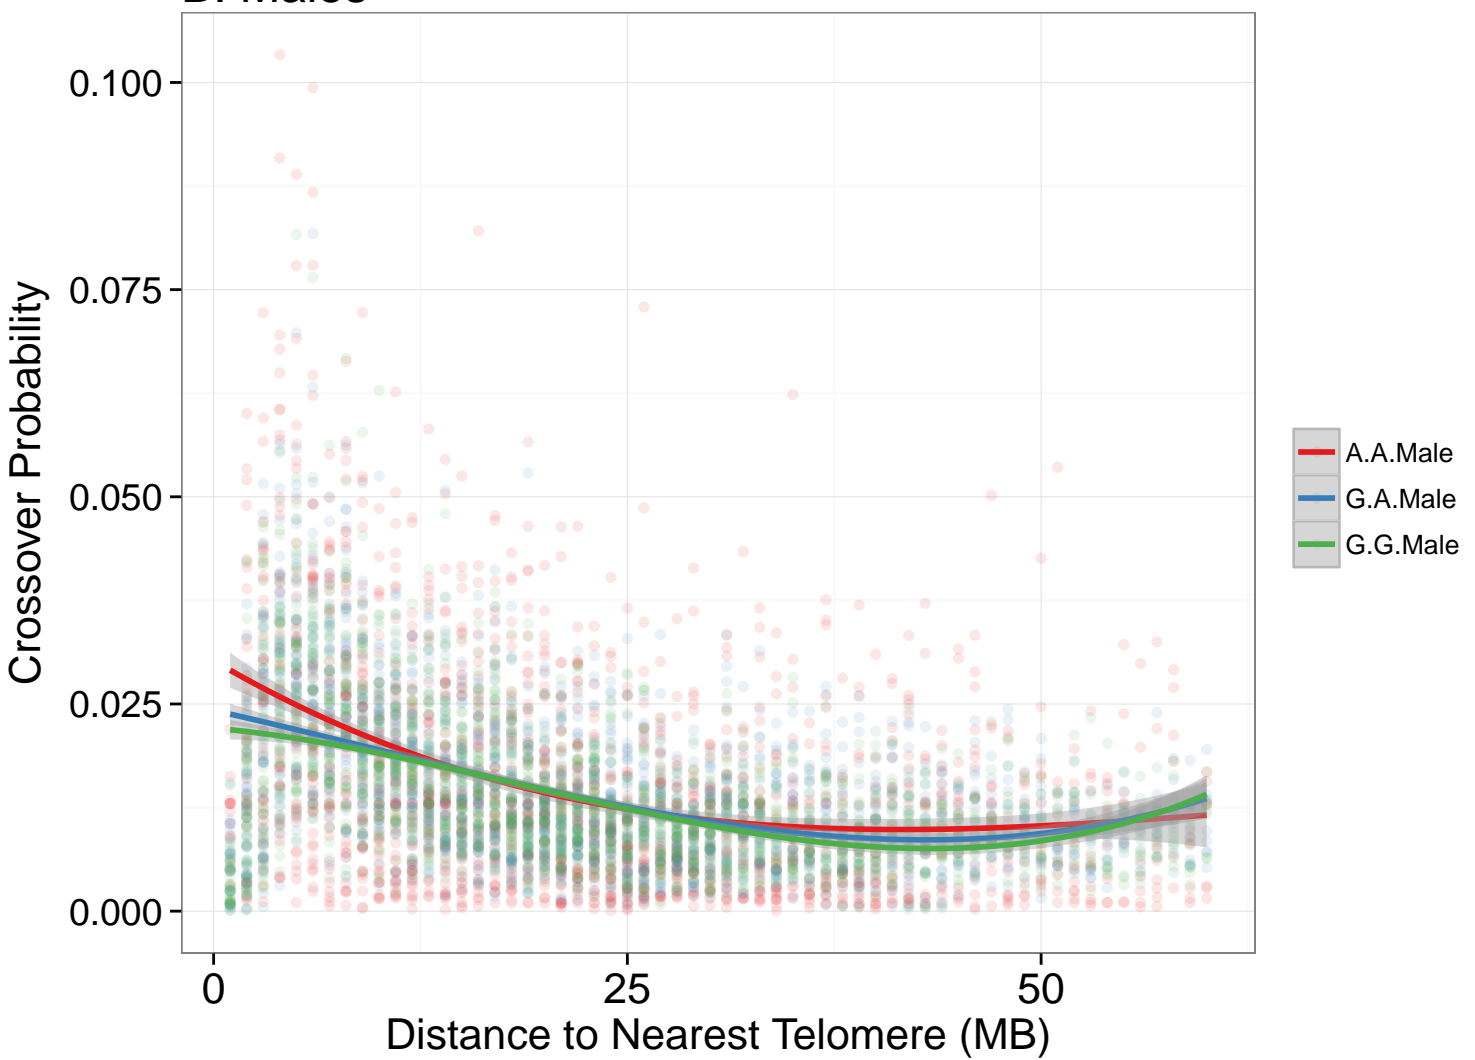

Supplement: Supplementary file [file 024869-7.pdf]
